# Supplementary material for: Mechanochemical synthesis of Li-rich (Li2Fe)SO cathode for Li-ion batteries
Source: Royal Society of Chemistry journal article supplement (doi:10.1039/d3gc00861d), 2023-01-01
Supplement: d3gc00861d1.pdf [file d3gc00861d1.pdf]

Mechanochemical synthesis of Li-rich ( $\text{Li}_2\text{Fe}$ )SO cathode for Li ion batteries

M.A.A. Mohamed<sup>a,b,\*</sup>, H. A. A. Saadallah<sup>a,b</sup>, I. G. Gonzalez-Martinez<sup>a</sup>, M. Hantusch<sup>a</sup>, M. Valldor<sup>c</sup>, B. Büchner<sup>a</sup>, S. Hampel<sup>a</sup>, N. Gräßler<sup>a,\*</sup>

<sup>a</sup>Leibniz Institute for Solid State and Materials Research (IFW) Dresden e.V.,  
Helmholtzstraße 20, D-01069 Dresden, Germany

<sup>b</sup>Department of Physics, Faculty of Science, Sohag University, 82524 Sohag, Egypt

<sup>c</sup>Department of Chemistry, University of Oslo, Postbox 1033, Blindern, N - 0315 Oslo,  
Norway

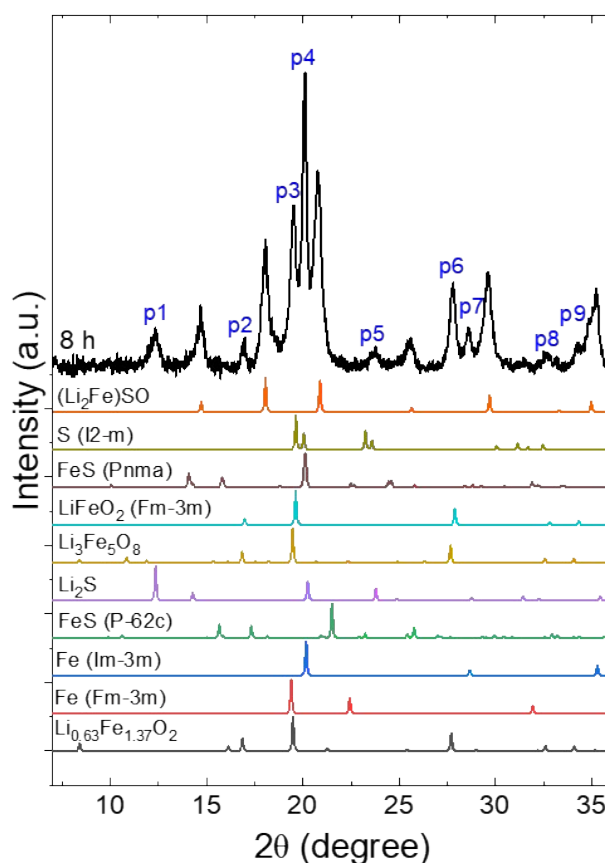

Fig S1. XRD pattern using Mo  $\text{K}_{\alpha 1}$  radiation source ( $\lambda=0.70926 \text{ \AA}$ ) of the milled powder after 8 h using a 3:1 BPR. The labels from p1 to p9 refer to the peaks of the secondary phases. The XRD patterns below the sample labeled with 8 h are the references for possible phases.

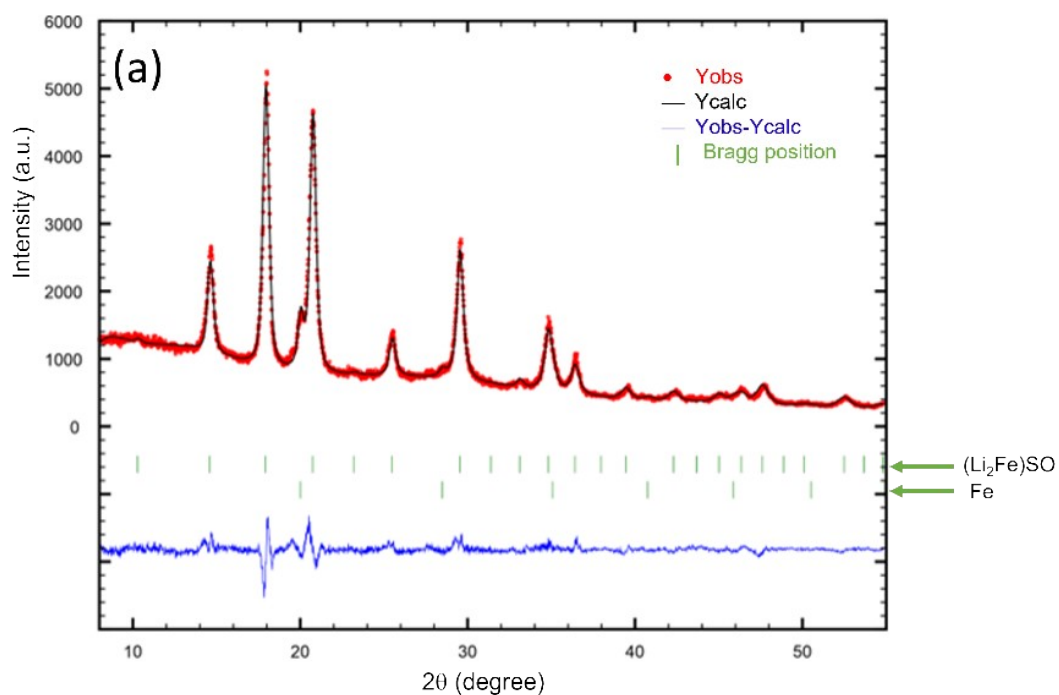

Fig. S2. Rietveld analyses for the ball-milled (Li<sub>2</sub>Fe)SO (after 110 h milling in Fig. 2).

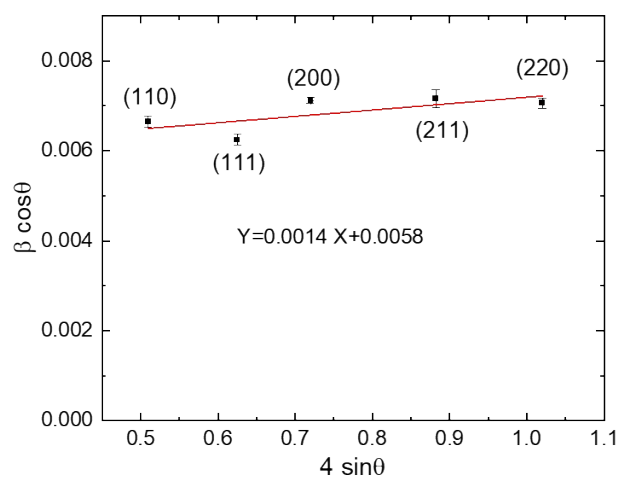

Fig. S3. W-H plot for ball-milled (Li<sub>2</sub>Fe)SO together with the corresponding fitting equation.

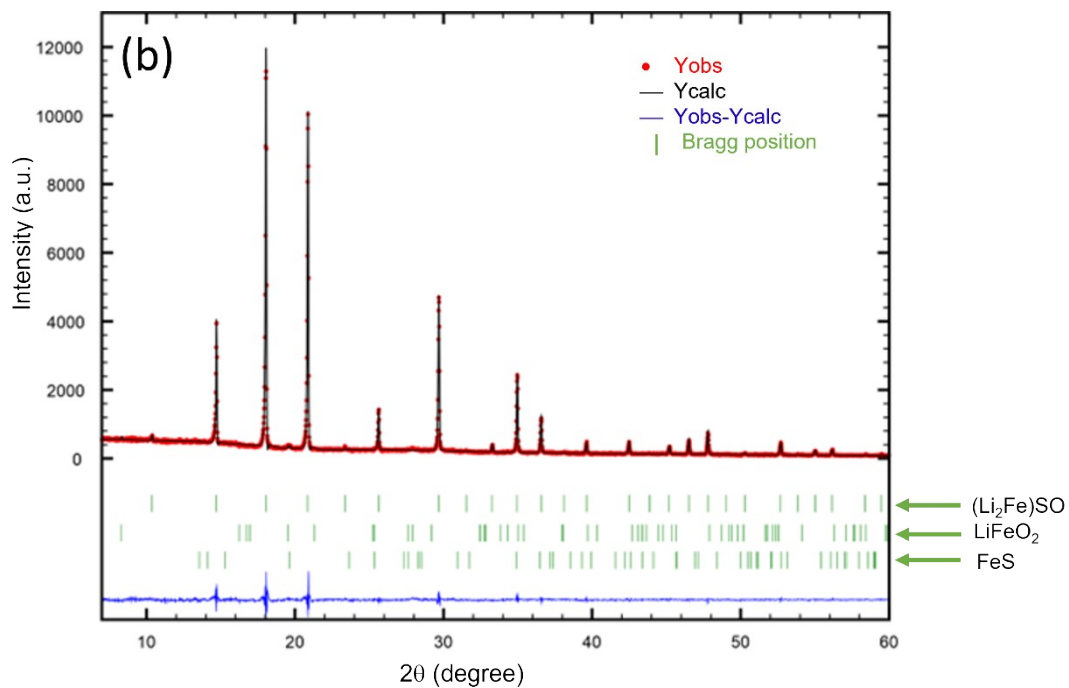

Fig. S4. Rietveld analyses for the ball-milled (Li<sub>2</sub>Fe)SO after heat treatment at 500 °C.

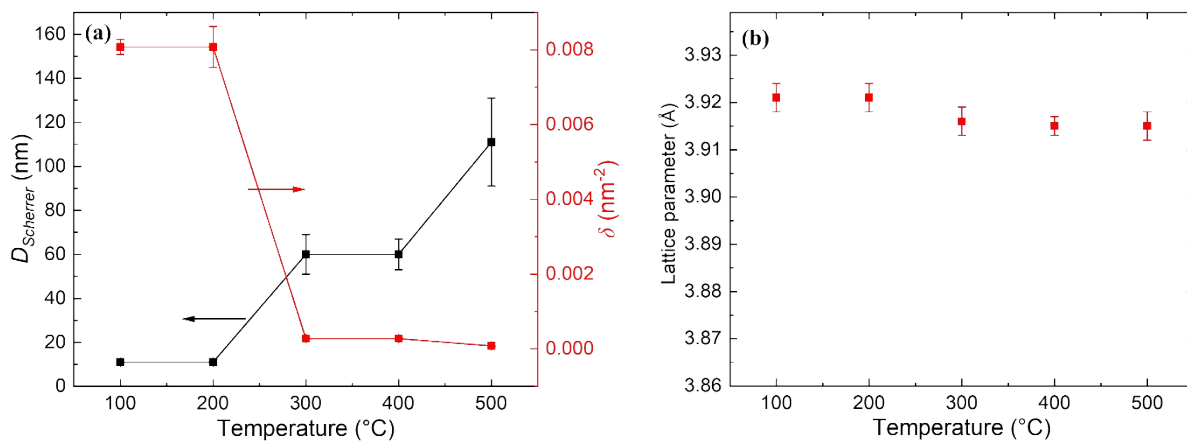

Fig. S5. Variation of Scherrer crystallite size ( $D_{Scherrer}$ ) and dislocations density ( $\delta$ ) (a) and lattice parameter (b), as a function of the subsequent heat treatment temperature of the ball-milled (Li<sub>2</sub>Fe)SO.

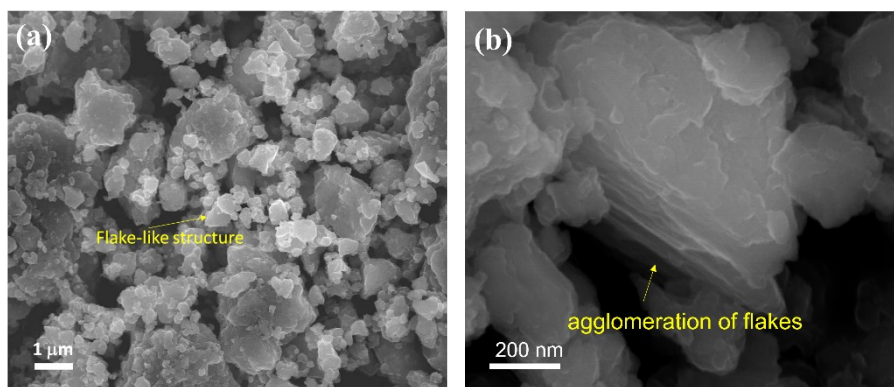

Fig. S6. Flake-like structures of ball-milled  $(\text{Li}_2\text{Fe})\text{SO}$ .

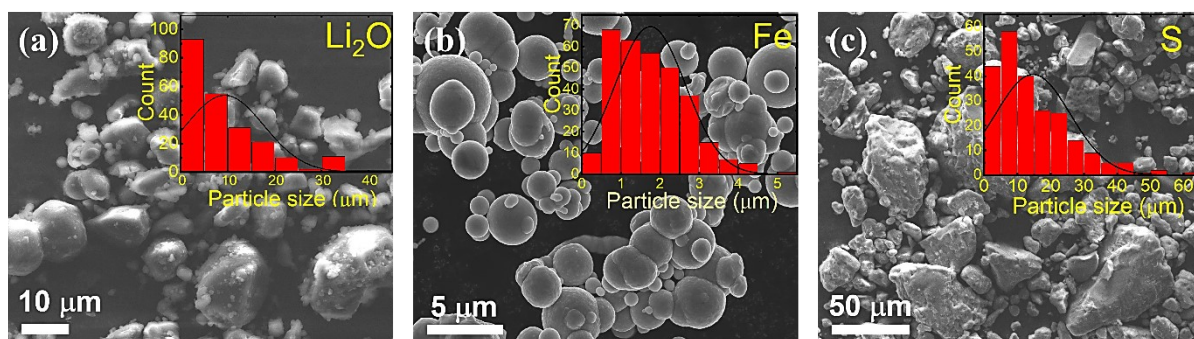

Fig. S7. SEM images of the raw materials ( $\text{Li}_2\text{O}$ , Fe, and S) used in the synthesis of  $(\text{Li}_2\text{Fe})\text{SO}$ . The insets represent the corresponding particle size distributions.

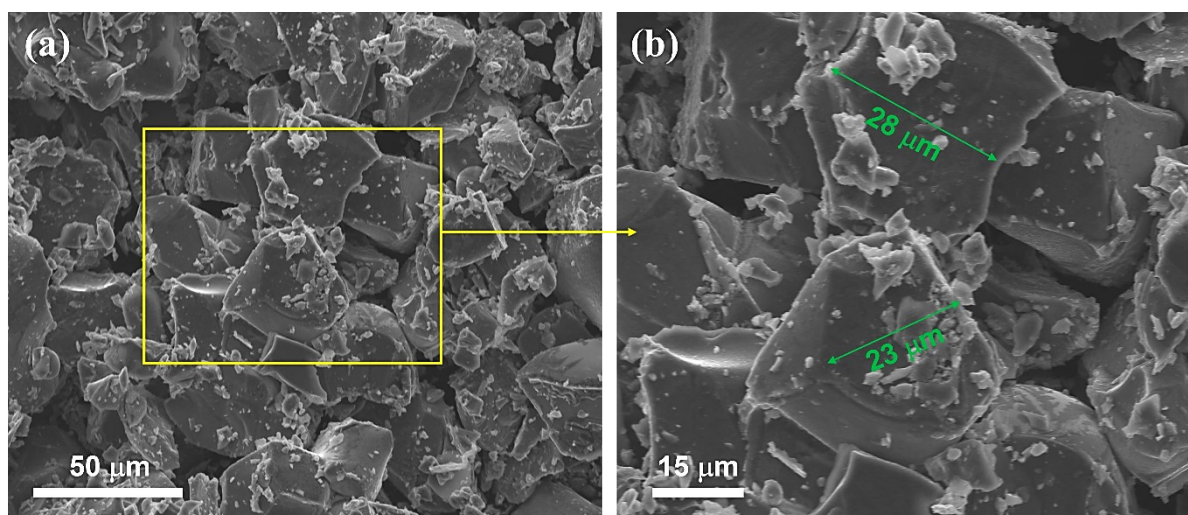

Fig. S8. SEM images for  $(\text{Li}_2\text{Fe})\text{SO}$  prepared by solid state reaction method. The synthesis was reproduced from ref.1.<sup>1</sup>

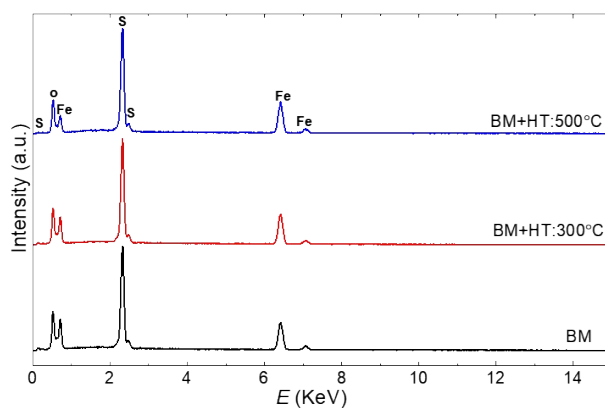

Fig. S9. EDS for ball-milled  $(\text{Li}_2\text{Fe})\text{SO}$  (black) and ball-milled  $(\text{Li}_2\text{Fe})\text{SO}$  followed by post-heat treatment at 300 °C (red) and 500 °C (blue).

Table S1. EDS results for  $(\text{Li}_2\text{Fe})\text{SO}$  prepared under different conditions.

| composition                       | conditions                                | Atomic %   |            |            |
|-----------------------------------|-------------------------------------------|------------|------------|------------|
|                                   |                                           | Fe         | S          | O          |
| $(\text{Li}_2\text{Fe})\text{SO}$ | ball milling                              | 32.2±1.61  | 32.69±1.63 | 35.11±1.76 |
|                                   | ball milling+heat treatment (300 °C; 3 h) | 34.32±1.72 | 33.05±1.65 | 32.63±1.63 |
|                                   | ball milling+heat treatment (500 °C; 3 h) | 33.68±1.68 | 33.56±1.68 | 32.75±1.64 |

Table S2. ICP-OES results for ball-milled  $(\text{Li}_2\text{Fe})\text{SO}$  and ball-milled  $(\text{Li}_2\text{Fe})\text{SO}$  followed by post-heat treatment at 500 °C. The molar ratios are summed to be 5.

| composition                       | conditions                               | Mass%   |         |         | Molar ratios |         |         |      |
|-----------------------------------|------------------------------------------|---------|---------|---------|--------------|---------|---------|------|
|                                   |                                          | Li      | Fe      | S       | Li           | Fe      | S       | O    |
| $(\text{Li}_2\text{Fe})\text{SO}$ | ball milling                             | 11.4(4) | 47.3(2) | 26.6(6) | 1.94(6)      | 0.99(1) | 0.98(2) | 1.09 |
|                                   | ball milling + heat treatment (500°C-3h) | 11.5(1) | 47(2)   | 25.9(5) | 1.93(2)      | 0.98(5) | 0.94(2) | 1.15 |

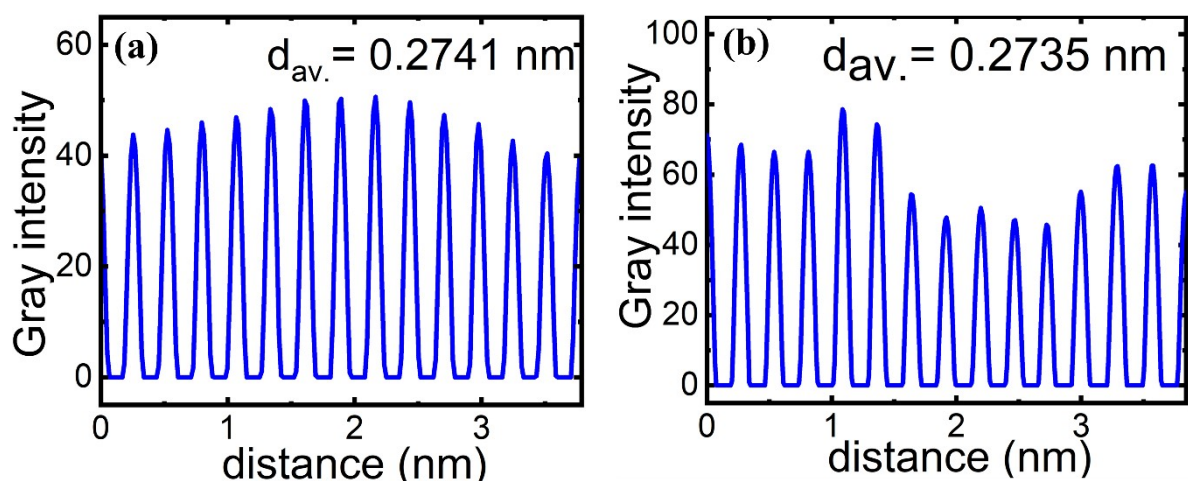

Fig. S10. Plot profile based on inverse Fourier transformation (FT) analysis for ball-milled  $(\text{Li}_2\text{Fe})\text{SO}$  and (a) ball-milled  $(\text{Li}_2\text{Fe})\text{SO}$  followed by post-heat treatment at  $500^\circ\text{C}$  (b).

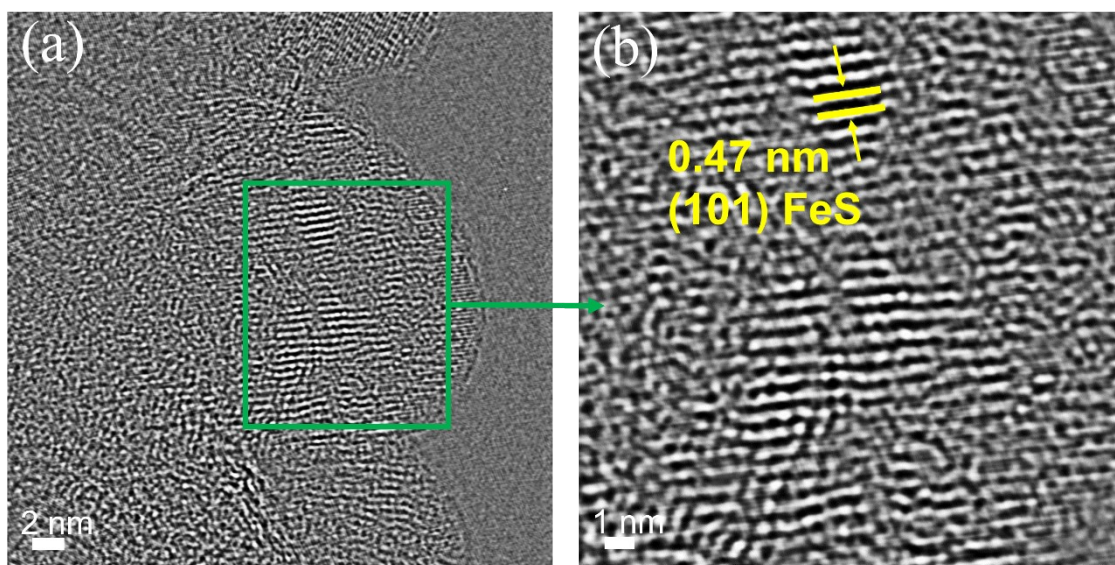

Fig. S11. Appearance of minor FeS impurity phase in the TEM images of heat-treated (at  $500^\circ\text{C}$ ) ball-milled  $(\text{Li}_2\text{Fe})\text{SO}$ .

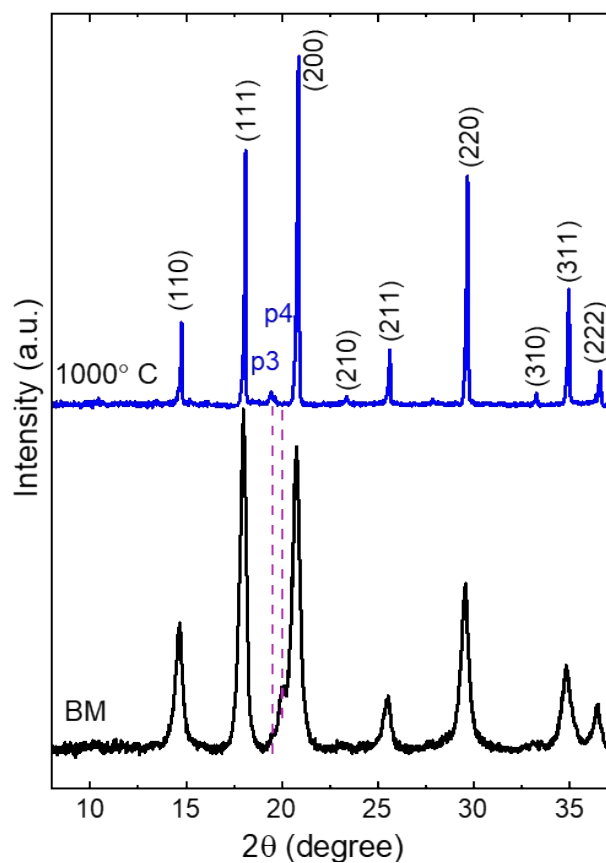

Fig. S12. XRD ( using Mo  $K_{\alpha 1}$  radiation source ( $\lambda=0.70926$  Å) for ball-milled  $(\text{Li}_2\text{Fe})\text{SO}$  (black) and ball-milled  $(\text{Li}_2\text{Fe})\text{SO}$  followed by post-heat treatment at  $1000^\circ\text{C}$  (blue).

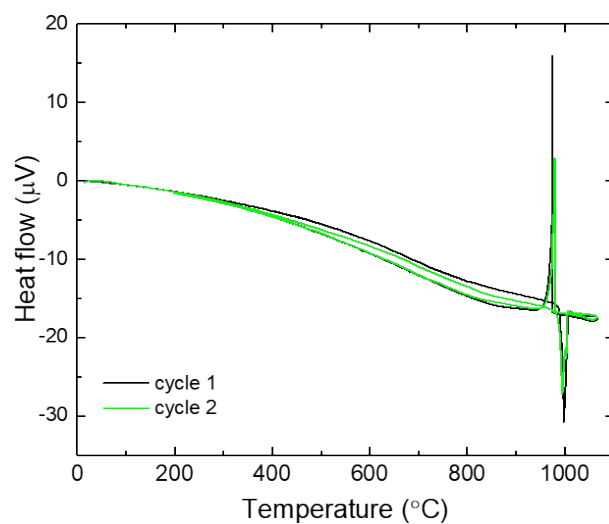

Fig. S13. DTA for ball-milled ( $\text{Li}_2\text{Fe}$ )SO followed by post-heat treatment at 500  $^{\circ}\text{C}$ .

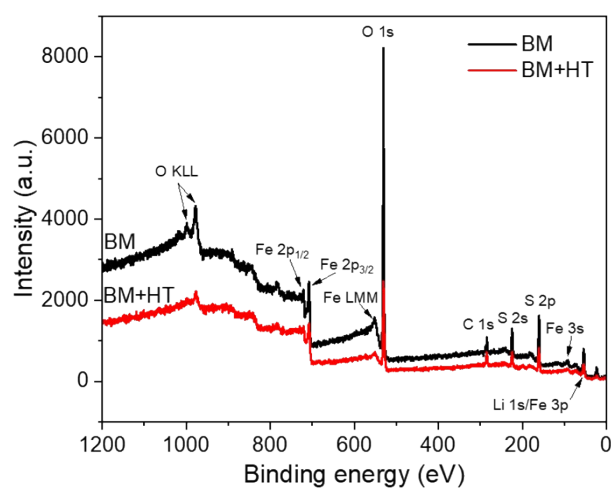

Fig. S14: Full XPS spectra for ( $\text{Li}_2\text{Fe}$ )SO synthesized by ball milling (BM) and ball milling followed by post-heat treatment at 500 $^{\circ}\text{C}$  (BM+HT).

**Table S3. Overview of selected properties of the antiperovskite (Li<sub>2</sub>Fe)SO material and current commercialized cathode materials.<sup>2–9</sup>**

| Composition<br>(Research time)                                                                                                                                                    | Structure      | Theoretical capacity <sup>a</sup><br>(mAh g <sup>-1</sup> ) | Practical capacity<br>(mAh g <sup>-1</sup> ) | Voltage plateau<br>(V) | Li <sup>+</sup> diffusion | Cost   | Toxicity            | Safety | Synthesis |
|-----------------------------------------------------------------------------------------------------------------------------------------------------------------------------------|----------------|-------------------------------------------------------------|----------------------------------------------|------------------------|---------------------------|--------|---------------------|--------|-----------|
| LiCoO <sub>2</sub> (LCO)<br>(1980)                                                                                                                                                | Layered        | 274                                                         | 140-155                                      | 3.8                    | 2D                        | High   | High                | Low    | Easy      |
| LiMn <sub>2</sub> O <sub>4</sub> (LMO)<br>(1983)                                                                                                                                  | Spinel         | 148                                                         | 100-120                                      | 4.1                    | 3D                        | Low    | Low                 | Medium | Easy      |
| LiFePO <sub>4</sub> (LFP)<br>(1997)                                                                                                                                               | Olivine        | 170                                                         | 170                                          | 3.4                    | 1D                        | Low    | Low                 | High   | Medium    |
| LiNi <sub>1/3</sub> Mn <sub>1/3</sub> Co <sub>1/3</sub> O <sub>2</sub><br>(NMC333)<br>LiNi <sub>0.8</sub> Co <sub>0.15</sub> Al <sub>0.05</sub> O <sub>2</sub><br>(NCA)<br>(1999) | Layered        | ~280                                                        | 155-200                                      | 3.7                    | 2D                        | Medium | Medium              | Medium | Medium    |
| (Li <sub>2</sub> Fe)SO*<br>(2017)                                                                                                                                                 | Antiperovskite | 455                                                         | ~280                                         | 2.5                    | 3D                        | Low    | Medium <sup>b</sup> | High   | Easy      |

<sup>a</sup> The theoretical capacity calculated corresponds to a complete extraction/insertion of Li-ion of the structure, with two Li-ions for antiperovskite (Li<sub>2</sub>Fe)SO and one Li-ion for other cathode materials.

<sup>b</sup> When considering only the heavy metal content, (Li<sub>2</sub>Fe)SO is classified as "low" similar to LMO and LFP. When taking the sulfur content into account, we have ordered it as "medium". The specific conversion of sulfur into certain species after the degradation or battery recycling process is unclear as there are no studies available.

\* Current commercialized cathode materials such as LiCoO<sub>2</sub>, LiNi<sub>1/3</sub>Mn<sub>1/3</sub>Co<sub>1/3</sub>O<sub>2</sub>, LiNi<sub>0.8</sub>Co<sub>0.15</sub>Al<sub>0.05</sub>O<sub>2</sub>, LiMn<sub>2</sub>O<sub>4</sub> and LiFePO<sub>4</sub> have some drawbacks despite their intensive optimization (see Table S3).<sup>3–9</sup> These cathodes depend mainly on the intercalation chemistry of Li<sup>+</sup> during electrochemical cycling. The intercalation chemistry is theoretically limited by the number of Li<sup>+</sup> moles per formula unit and the available redox states of the transition metal, which is usually restricted by one electron transfer.<sup>10</sup> The capacity of the intercalation cathodes is currently approaching its theoretical edge, which limits the energy density and represents a major hurdle. One approach to overcome such obstacle and increase the theoretical capacity is to use Li-rich cathodes with the multi-electron storage capability.<sup>10</sup> Li-rich oxides are attractive option to get access to multi-electron storage by involving cationic (transition metal) and anionic (oxygen) redox processes.<sup>11</sup> Nevertheless, triggering O 2p oxidation requires a high voltage which is outside the electrochemical stability of organic carbonate electrolyte.<sup>12</sup> Although multi-electron storage was indicated by the measured specific capacity in Li-rich oxides, other irreversible degradation reactions such as O<sub>2</sub> gas release and electrolyte decomposition was reported to contribute to the delivered capacity.<sup>13,14</sup> Instead, sulphides (S 3p) oxidize at lower voltage compared to oxides (O 2p) because of their higher energy frontier orbitals and therefore present a chance for multi-electron storage with avoiding the irreversible side reactions.<sup>10,12</sup> One Li-rich system which depends on sulfide S 3p redox (anionic) along with the transition metal Fe 4p redox (cationic) is the antiperovskite (Li<sub>2</sub>Fe)SO.<sup>2</sup> The table shows a strong interest in new cathode materials that combine high specific capacity, environmental friendliness, low cost, and high cut-off potential due to the specific disadvantages of current materials. We recognize that it is difficult to make a quantitative comparison between the novel antiperovskite material, which is still in the early stages of research. Therefore, specific parameters have been evaluated and the properties of the (Li<sub>2</sub>Fe)SO material have been considered to the best of our knowledge. Note that the electrochemical performance of (Li<sub>2</sub>Fe)SO cathode material synthesized by solid state reaction was used in Table S3.<sup>2</sup>

## References

- 1 K. T. Lai, I. Antonyshyn, Y. Prots and M. Valldor, *J. Am. Chem. Soc.*, 2017, **139**, 9645–9649.
- 2 D. Mikhailova, L. Giebeler, S. Maletti, S. Oswald, A. Sarapulova, S. Indris, Z. Hu, J. Bednarcik and M. Valldor, *ACS Appl. Energy Mater.*, 2018, **1**, 6593–6599.
- 3 X. Shen, X. Q. Zhang, F. Ding, J. Q. Huang, R. Xu, X. Chen, C. Yan, F. Y. Su, C. M. Chen, X. Liu and Q. Zhang, *Energy Mater. Adv.*, 2021, **2021**, 1-15
- 4 P. Guan, L. Zhou, Z. Yu, Y. Sun, Y. Liu, F. Wu, Y. Jiang and D. Chu, *J. Energy Chem.*, 2020, **43**, 220–235.
- 5 N. Nitta, F. Wu, J. T. Lee and G. Yushin, *Mater. Today*, 2015, **18**, 252–264.
- 6 H. Li and H. Zhou, *Chem. Commun.*, 2012, **48**, 1201–1217.
- 7 A. Butt, G. Ali, K. Tul Kubra, R. Sharif, A. Salman, M. Bashir and S. Jamil, *Energy Technol.*, 2022, **10**, 2100775.
- 8 F. Wu, J. Maier and Y. Yu, *Chem. Soc. Rev.*, 2020, **49**, 1569–1614.
- 9 Y. Lu, Q. Zhang and J. Chen, *Sci. China Chem.*, 2019, **62**, 533–548.

- 10 C. J. Hansen, J. J. Zak, A. J. Martinolich, J. S. Ko, N. H. Bashian, F. Kaboudvand, A. Van Der Ven, B. C. Melot, J. Nelson Weker and K. A. See, *J. Am. Chem. Soc.*, 2020, **142**, 6737–6749.
- 11 W. Zuo, M. Luo, X. Liu, J. Wu, H. Liu, J. Li, M. Winter, R. Fu, W. Yang and Y. Yang, *Energy Environ. Sci.*, 2020, **13**, 4450–4497.
- 12 S. Saha, G. Assat, M. T. Sougrati, D. Foix, H. Li, J. Vergnet, S. Turi, Y. Ha, W. Yang, J. Cabana, G. Rousse, A. M. Abakumov and J. M. Tarascon, *Nat. Energy*, 2019, **4**, 977–987.
- 13 S. E. Renfrew and B. D. McCloskey, *ACS Appl. Energy Mater.*, 2019, **2**, 3762–3772.
- 14 J. Rana, J. K. Papp, Z. Lebens-Higgins, M. Zuba, L. A. Kaufman, A. Goel, R. Schmuck, M. Winter, M. S. Whittingham, W. Yang, B. D. McCloskey and L. F. J. Piper, *ACS Energy Lett.*, 2020, **5**, 634–641.
